# Supplementary material for: Optimizing the piezocatalytic hydrogen production activity of metal-organic frameworks through precise defect engineering
Source: Research Square preprint supplement (doi:10.21203/rs.3.rs-6644383/v1), 2025-05-29
Supplement: Supplementary file 1 [file 0e3d46a308551e3a1b7d1e24.docx]

**Optimizing the piezocatalytic hydrogen production activity of metal-organic frameworks through precise defect engineering**

**Author Information**

Affiliations

aSchool of Science, Harbin Institute of Technology, Shenzhen 518055, PR China

bState Key Laboratory of Urban Water Resource and Environment, School of Ecology and Environment, Harbin Institute of Technology, Shenzhen 518055, PR China

Bing Wanga#, Zhen Sunb#, Jiahui Chena, Jiayin Yea, Abhinandan Kumara, Peng Rena*, Guan Zhangb*, Jin Zhanga*

# Contributed equally.

*Corresponding author. E-mail address: renpeng@hit.edu.cn (P. Ren), [zhangguan@hit.edu.cn](mailto:zhangguan@hit.edu.cn) (G. Zhang), jinzhang@hit.edu.cn (J. Zhang)

1. Number of missing BDC linker characterization by TGA

Here, we define ***x*** as the number of missing BDC linkers in the material. In this study, we define ***m*** as the ratio of the mass at 450°C to the final mass at 600°C, with subscripts indicating different temperatures. The number of missing BDC linkers (***x***) in the structure can be determined using the following equation1:

1. The carrier concentration (*N*D) and conduction band (*C*B) position calculated from the Mott-Schottky measurements

According to the Mott-Schottky equation for n-type semiconductor:2, 3

Here, *C* iscapacitor and *A* is the interfacial capacitance and area, respectively. *N*D is the number of carrier concentration, *V* is the applied voltage, *k*B is Boltzmann’s constant, *T* the absolute temperature, and *e* is the electronic charge, is relative dielectric constant, the vacuum dielectric constant. *K*B*T*/*e* can be ignored at room temperature. The slope of the linear fitting to the second half of the 1/*C*2 versus *V* plot is denoted as *K*, while the intercept corresponds to *V*FB,Ref. Therefore, *N*D can be estimated as:

Meanwhile, the flat band potential *V*FB,SHEcan be calculated as:

Here, can be calculated according to the Tauc plot from Figure S7. PH refers to the pH value of the test solution. *E*Ref represents the reference electrode potential relative to the standard hydrogen electrode (SHE). *E*Ref is 0.197 V for **Ag/AgCl electrode. The conduction band potential *C*B can be calculated as:**

DF is the band bending correction, which was taken as 0.2 V here.

1. Supplementary figures and tables

Figure S1. (a) The PXRD patterns of UiO-66 crystals. (b) The simulated PXRD patterns of UiO-66 with the ***fcu*** and ***reo* topologies**.

Figure S2. The TGA patterns of UiO-66 crystals.

Figure S3. The 1H-NMR patterns of UiO-66 crystals.

Figure S4. The BET surface areas of UiO-66 crystals.

.

Figure S5. Two independent replicate tests on hydrogen yields of UiO-66 crystals.

Figure S6. (a) The Tafel and (b) the charge transfer resistance (*R*ct) of UiO-66 crystals.

Figure S7. (a) DR UV-vis spectra and (b) Tauc plots of UiO-66 crystals.

Table S1. Experimental conditions used for pristine and defective UiO-66. The reagents selected were as follows: the metal salt (*M*) was HfCl₄ (Aldrich, 98%), the organic ligand (*L*) was 1,4-dicarboxylic acid (BDC, Aldrich, 98%), and the modulator (Mod) was formic acid (FA, Alfa Aesar, 97%), N,N-dimethylformamide (DMF, Scharlau).

| Sample | Temperature  (℃) | L/M  ratio | Mod/L | M  [mmol] | L  [mmol] | Mod [mmol] | DMF  [mL] | V  [mL] |
| --- | --- | --- | --- | --- | --- | --- | --- | --- |
| 1.5 (180 ℃) | 180 | 1.5 | 94.06 | 0.24 | 0.36 | 33.9 | 4 | 5 |
| 1.5 | 120 | 1.5 | 94.06 | 0.24 | 0.36 | 33.9 | 4 | 5 |
| 1.0 | 120 | 1.0 | 112,9 | 0.3 | 0.3 | 33.9 | 4 | 5 |
| 0.8 | 120 | 0.8 | 127.0 | 0.3 | 0.3 | 33.9 | 4 | 5 |
| 0.4 | 120 | 0.4 | 197.5 | 0.4 | 0.2 | 33.9 | 4 | 5 |

Table S2. Position of conduction band (*C*B) and position of flat band (*V*B) relative to SHE and bandgap (*E*g) of UiO-66 crystals.

| L/M | *C*B (V) | *V*B (V) | *E*g (eV) |
| --- | --- | --- | --- |
| 1.5 (180 ℃) | -0.25 | 4.32 | 4.57 |
| 1.5 | -0.23 | 4.39 | 4.62 |
| 1.0 | -0.29 | 4.05 | 4.34 |
| 0.8 | -0.22 | 4.33 | 4.55 |
| 0.4 | -0.21 | 4.48 | 4.69 |

**Reference**

1. Tatay, S.; Martinez-Gimenez, S.; Rubio-Gaspar, A.; Gomez-Oliveira, E.; Castells-Gil, J.; Dong, Z.; Mayoral, A.; Almora-Barrios, N.; N, M. P.; Marti-Gastaldo, C., Synthetic control of correlated disorder in UiO-66 frameworks. *Nature Communacation* **2023,** *14* (1), 6962.

2. Sivula, K., Mott–Schottky Analysis of Photoelectrodes: Sanity Checks Are Needed. *ACS Energy Letters* **2021,** *6* (7), 2549-2551.

3. Gelderman, K.; Lee, L.; Donne, S. W., Flat-Band Potential of a Semiconductor: Using the Mott–Schottky Equation. *Journal of Chemical Education* **2007,** *84* (4), 685.
